# Supplementary material for: Influence of a Prolonged Tennis Match Play on Serve Biomechanics
Source: PLoS One. 2016 Aug 17;11(8):e0159979. doi: 10.1371/journal.pone.0159979 (PMC4993075; doi:10.1371/journal.pone.0159979)
Supplement: S1 File — (XLSX) [file pone.0159979.s001.xlsx]

## Sheet: Performance parameters.XLS
Players	Vball T0	Vball T90	Vball T180		GRF T0	GRF T90	GRF T180		Impact height T0	Impact height T90	Impact height T180		knee flexion angle T0	knee flexion angle T90	knee flexion angle T180		angular velocity of knee extension T0	angular velocity of knee extension T90	angular velocity of knee extension T180
1	153	151	153		1628.7	1806	1614.5		2.63	2.58	2.61		98	98.39	92.91		754	876	710
1	155	162	152		1640.2	1562.4	1654.8		2.63	2.59	2.61		96.42	93.63	97.83		782	743	691
1	151	164	153		1672.3	1609.6	1651.8		2.64	2.6	2.61		98.06	91.49	91		744	745	673
1	156	160	158		1696.6	1627	1610.8		2.65	2.61	2.6		97.65	92.13	91.35		827	753	684
1	149	163	162		1688.3	1389.7	1599.1		2.63	2.63	2.61		94.65	96.13	89.79		737	809	758
2	150	145	144		960	976.3	933.9		2.56	2.55	2.53		125.6	126.1	130.7		417	409	330
2	151	143	148		976.7	964.7	995		2.53	2.47	2.51		124.2	126.2	127.2		433	374	343
2	145	146	141		951	887.1	953.9		2.54	2.47	2.51		124.4	125.7	129.2		347	374	395
2	148	149	147		960.8	982.7	978		2.57	2.51	2.51		124	127.1	130.8		340	386	314
2	157	148	144		976.7	951	983.7		2.51	2.51	2.52		122.2	129.1	130.2		481	350	331
3	153	136	118		1614.1	1547	1477.2		2.75	2.7	2.62		96.81	106.4	113.5		325	222	239
3	151	145	140		1563	1655.3	1433.7		2.7	2.74	2.63		92.79	105.4	109.5		361	307	224
3	155	146	141		1526.6	1653.2	1479.4		2.7	2.73	2.69		90.76	103.7	114.7		326	306	192
3	154	148	145		1596	1662.3	1574.5		2.73	2.72	2.7		90.59	102.8	114		407	302	198
3	150	152	150		1642.2	1699.8	1531		2.76	2.77	2.68		91.94	99.67	109.2		353	327	220
4	160	151	140		895	982.2	1013.7		2.5	2.58	2.58		91.27	101.8	109.9		364	349	312
4	161	156	139		946.9	1043.9	1015.4		2.52	2.56	2.58		94.29	102.3	114.5		383	350	271
4	160	152	147		1007.3	993	983.4		2.53	2.55	2.57		89.52	104.3	109.1		396	338	296
4	160	159	151		940.3	985	954.8		2.53	2.5	2.48		89.43	102.4	104.2		416	301	325
4	160	148	144		1003.5	961.3	1033.6		2.55	2.48	2.58		84.42	100.6	99.11		449	333	385
5	181	161	174		1508.2	1459.7	1506.8		2.63	2.64	2.66		121.9	132.4	123.9		653	525	653
5	175	178	165		1500.2	1568	1507		2.69	2.66	2.67		120.8	133.2	123.2		578	528	610
5	174	179	162		1465.6	1534	1529.7		2.65	2.67	2.68		128.1	131.3	119.5		503	581	626
5	175	168	166		1537.3	1540.6	1544.4		2.68	2.7	2.67		124.7	129.6	119.6		562	500	570
5	183	171	173		1537.7	1606.7	1475.6		2.62	2.68	2.65		125.6	129	119.4		589	528	642
6	177	176	174		1589.8	1660.9	1648.1		2.66	2.65	2.6		95.09	91.24	92.5		519	452	426
6	174	175	178		1553	1695.8	1690.2		2.68	2.66	2.61		92.47	91.81	97.42		489	440	390
6	174	179	175		1818.2	1655.8	1711.9		2.69	2.64	2.65		88.53	91	92.3		554	433	463
6	172	173	174		1675.6	1656.9	1747.2		2.7	2.66	2.68		93.93	90.64	92.03		538	445	469
6	171	167	182		1805.8	1721.8	1625.1		2.7	2.71	2.58		91.35	92.75	88.93		610	460	451
7	177	177	177		1398.1	1390.7	1328.6		2.64	2.56	2.6		91.63	89.84	91.28		593	515	649
7	179	177	171		1530.2	1396.4	1408.6		2.66	2.59	2.62		91.03	96.51	89.66		740	579	587
7	179	166	158		1411.1	1401.2	1406.1		2.66	2.65	2.68		90.12	95.48	85.11		679	640	558
7	171	180	178		1563.6	1423.9	1323.5		2.64	2.65	2.58		92.99	93.41	87.78		677	744	650
7	181	159	179		1376.7	1157	1327.4		2.6	2.57	2.59		93.85	99.61	89.19		677	722	600
8	170	170	165		1124.3	1165.1	1159.1		2.75	2.65	2.63		93.29	92.26	97.14		639	479	439
8	170	171	159		1207.9	1175.9	1168.6		2.74	2.71	2.66		89.46	93.87	90.15		520	509	531
8	172	161	156		1138.2	1162.4	1225.6		2.74	2.71	2.67		89.36	92.2	95		546	508	474
8	167	155	163		1133.8	1132	1181.4		2.78	2.74	2.64		87.19	92.27	90.62		507	500	483
8	165	162	169		1101.8	1116.6	1191.4		2.73	2.69	2.63		85.95	89.15	93.18		542	491	487

## Sheet: MPF and RPE
Players	T0 MPF Biceps (Hz)	T180 MPF Biceps (Hz)	T0 MPF Deltoide (Hz)	T180 MPF Deltoide (Hz)	T0 MPF Serratus Anterior	T180 MPF Serratus Anterior	T0 MPF Latissimus Dorsi	T180 MPF Latissimus Dorsi	T0 MPF Pectoralis Major	T180 MPF Pectoralis Major	T0 MPF Infraspinatus	T180 MPF Infraspinatus	T0 MPF Middle Trapezius	T180 MPF Middle Trapezius	T0 MPF Triceps	T180 MPF Triceps		RPE T0	RPE T90	RPE T180
1	132.95	106.71	118.74	120.21	101.26	117.22	132.89	124.3	122.77	113.96	128.24	126.87	151.14	145.33	124.53	98.67		8	10	19
2	137.39	140.2	129.45	127.09	131.28	128.24	127.48	130	122.4	115.44	183.23	154.73	101.1	96.8	174	167.95		6	10	17
3	132.5	130.47	151.79	144.07	143.9	138.4	124.08	132.25	162.41	151.64	174.64	170.14	145.76	139.78	178.92	178.89		6	15	18
4	123.18	120.32	168.11	145.45	131.13	130.97	132.74	112.01	113.53	107.48	135.68	131.45	140.65	138.51	165.08	140.29		7	13	18
5	143.63	137.49	277.84	154.21	159.17	151.13	144.76	146.04	140.25	123.72	175.99	172.84	141.57	140	144.82	132.77		10	14	18
6	120.78	115.41	148.2	140.59	143.62	129.09	156.06	159.65	155.48	142.61	179.65	163.06	146.72	144.2	154.63	139.43		9	13	16
7	127.41	125	127.41	125	145.5	133.65	116.95	116	123.46	111.23	132.89	143.49	133.71	123.17	198.45	202		6	11	15
8	144.3	93.31	130.62	129.19	128.79	133.25	117.67	121.95	152.96	125.63	178.24	143.56	127.71	127.4	205.97	159.13		6	14	17

## Sheet: kinetics and kinematics
forces	T0	SD	T90	SD	T180	SD	torques	T0	SD	T90	SD	T180	SD	angular velocity (°/s)	T0	SD	T90	SD	T180	SD	temporal parameters (% serve)	T0	SD	T90	SD	T180	SD
Shoulder anterior force	202.5	52	207.6	64.9	185.7	48	Shoulder internal rotation	64.96	13.5	62.8	10.4	62.02	14.66	shoulder internal rotation	2361	511	2289	463	2185	435	shoulder internal rotation	98.9	1.1	99.1	1.5	99	1
Shoulder inferior force	198.7	42.5	193.9	48.5	183.6	44.7	Shoulder horizontal adductio	51.26	13.27	51.79	16.25	48.02	13.73	elbow extension	1644	216	1612	247	1545	234	elbow extension	95.9	0.6	95.8	0.8	95.9	0.9
Shoulder proximal force	371.8	68.7	352.9	87.4	333.7	81.4	Shoulder abduction	70.06	15.04	70.52	20.81	65.23	17.89	wrist flexion	2454	562	2199	428	2116	334	wrist flexion	98.5	1.5	98.9	3.1	98.5	1.6
Elbow anterior force	102.1	27.7	105	31.2	96.8	36.5	Elbow varus	65.75	13.04	63.37	10.14	62.41	13.94	upper torso longitudinal rotat	652	144	648	159	634	144	upper torso longitudinal rotat	90.7	3.4	90.2	3.7	90.7	3.1
Elbow medial force	167.3	35	160.8	38.6	150.6	33.3	Elbow flexion	16.24	4.93	16.75	7.71	16.19	7.82	pelvis longitudinal rotation	492	112	496	133	469	123	pelvis longitudinal rotation	90.3	2.5	90.3	2.7	90.3	3
Elbow proximal force	367	69.1	344.2	67.2	331	76.6	Elbow extension	26.5	5.3	26.2	6.9	25.8	8.3	trunk transverse rotation	235	44	228	43	223	44	trunk transverse rotation	88.6	1.1	88.3	1.2	88.5	1.3
Wrist anterior force	174.9	41.3	171.4	37.1	170.2	47.6	Wrist flexion	21.47	4.28	20.71	4.31	20.34	4.21	trunk sagittal rotation	165	43	178	58	158	51	trunk sagittal rotation	94.6	1.6	95.3	5.5	95.3	4.3
Wrist medial force	58.5	17.6	57.9	19.7	55	17.6	Wrist radial deviation	19.57	5.18	18.74	5.21	16.95	4.04
Wrist proximal force	226.7	35.6	216.8	38.6	203.5	43.5

## Sheet: match data
	Mean duration of rallies	Effective playing time	number of strokes per point
Match 1	8.02	24.57	5.38
Match 2	7.5	20.61	4.99
Match 3	6.3	19.96	4.37
Match 4	7.81	21.92	5.26
